# Supplementary material
Source: MDPI journal article supplement (https://www.mdpi.com/2225-1154/10/7/109)
Supplement: s1 [file s1]

Archive with 1 entries (1 files):
- climate-1739769-supplementary.pdf
